# Supplementary material
Source: PubMed Central journal article supplement (PMC3117114)
Supplement: NIHMS295120-supplement-1.pdf [file NIHMS295120-supplement-1.pdf]

**Supplemental Material**

**Tetrahydrobiopterin Deficiency and Nitric Oxide Synthase Uncoupling Contribute to  
Atherosclerosis Induced by Disturbed Flow**

**Li Li<sup>1,2</sup>, Wei Chen<sup>1</sup>, Amir Rezvan<sup>1</sup>, Hanjoong Jo<sup>1,3</sup>, David G. Harrison<sup>1,2,4</sup>**

Supplemental Figure I

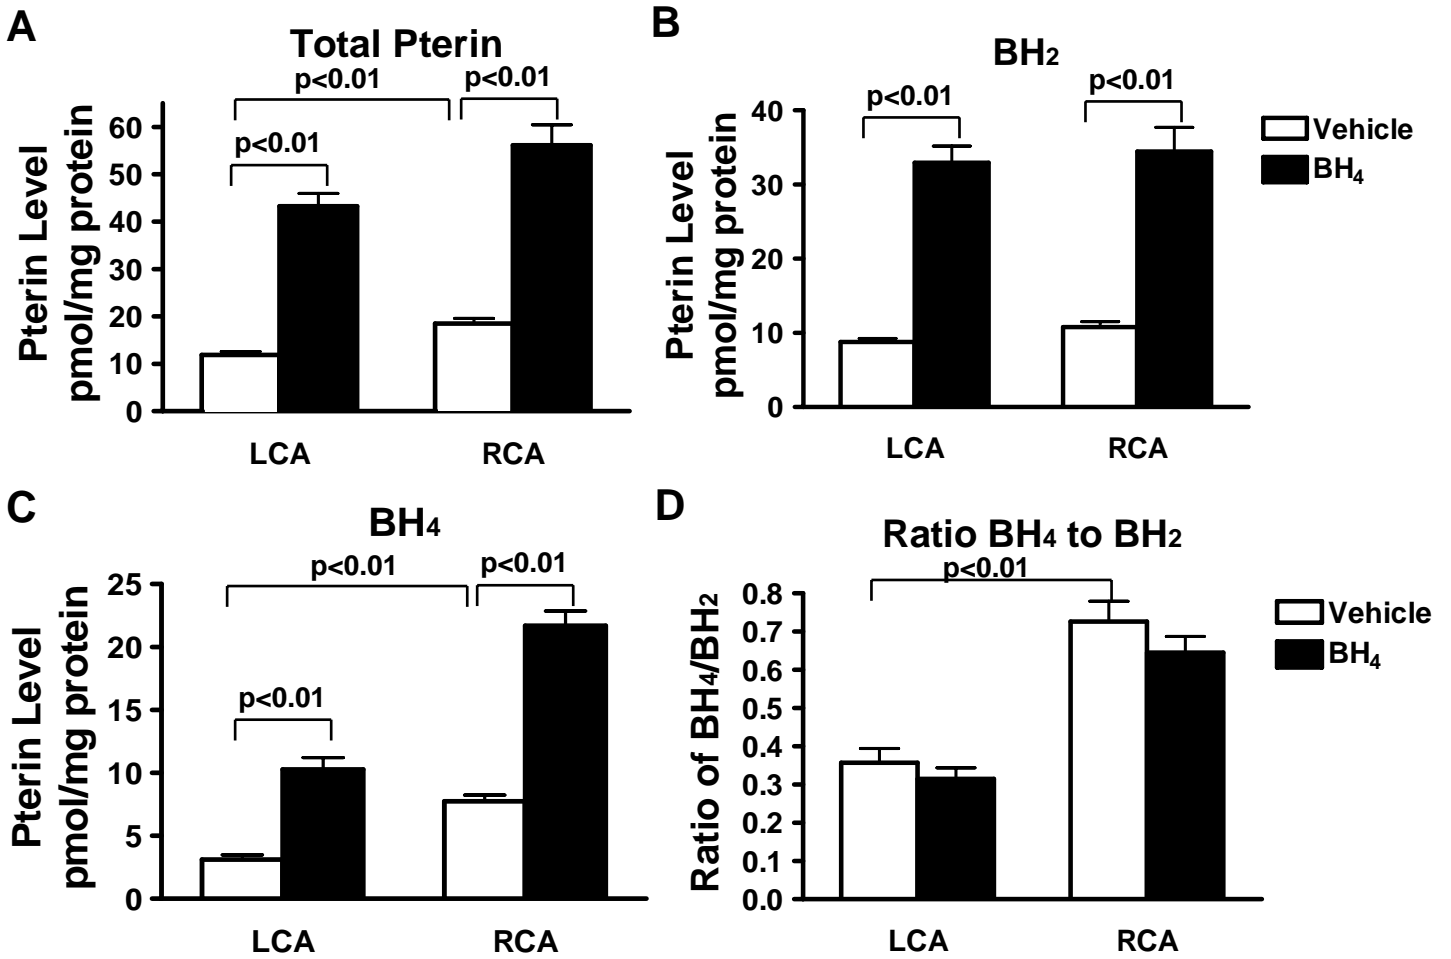

**Supplemental Figure I:** Pterin levels in the carotids that underwent partial ligation for 1 week. The left carotid arteries of ApoE<sup>-/-</sup> mice were partially ligated and mice were treated with an approximate dose of 10 mg/kg per day BH<sub>4</sub> in the drinking water or vehicle for 1 week. Total biopterin (Panel A), BH<sub>2</sub> (Panel B), BH<sub>4</sub> (Panel C) levels and the ratio of BH<sub>4</sub>/BH<sub>2</sub> (Panel D) in the carotids were shown (n=5). Values were compared using two-way ANOVA and selected comparisons were made using a Bonferroni post hoc test.

**Supplemental Figure II**

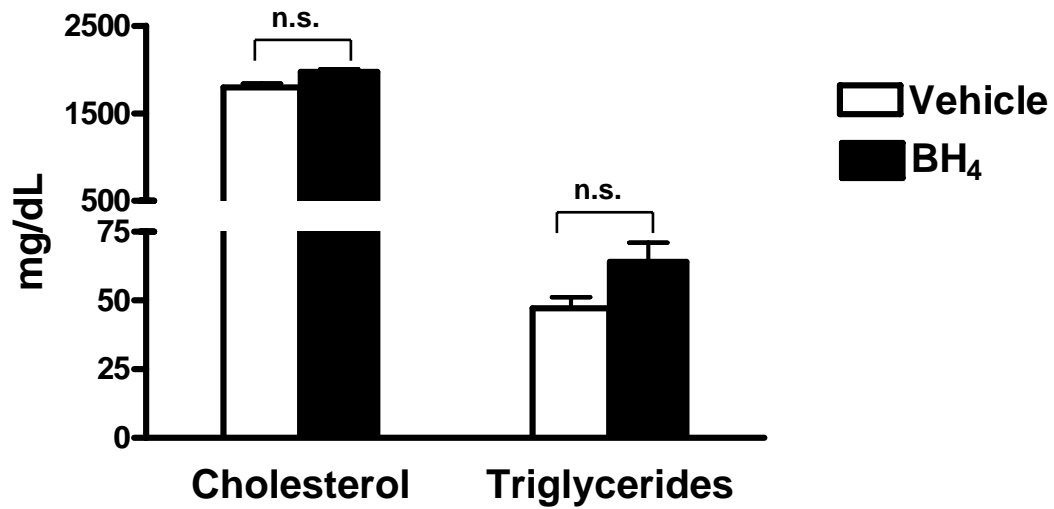

**Supplemental Figure II:** Effect of BH<sub>4</sub> supplementation on plasma lipid profile in ApoE<sup>-/-</sup> mice. ApoE<sup>-/-</sup> mice were treated with BH<sub>4</sub> or vehicle in the drinking water and fed a high fat diet for 3 weeks (n=4-5). Values were compared using ANOVA and selected comparisons were made using a Bonferroni post hoc test.

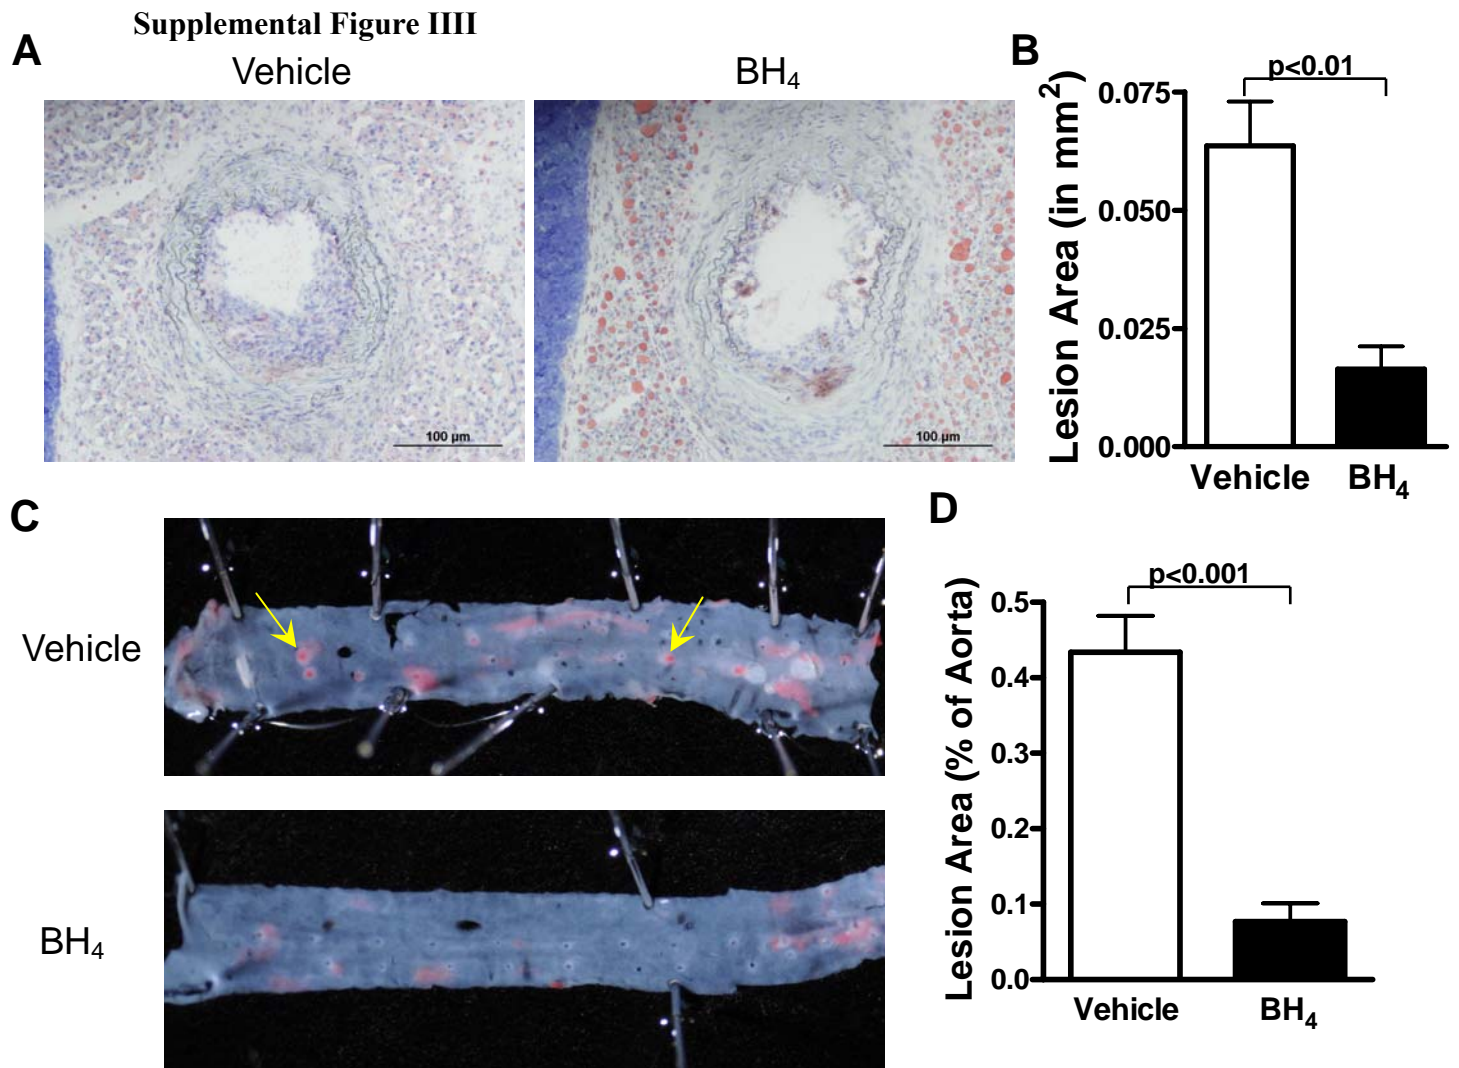

**Supplemental Figure III:** Effect of BH<sub>4</sub> treatment on atherosclerosis in the brachiocephalic and intercostal arteries of ApoE<sup>-/-</sup> mice fed a high fat diet for 3 weeks. Animals also received BH<sub>4</sub> or vehicle in the drinking water for 3 weeks. A. Representative images of Hematoxylin and Oil red O staining of the brachiocephalic artery frozen sections. B. Quantification of the intimal lesion areas using Image J (n=5-6). Values were compared using an unpaired t-test. C. Representative images of en face Oil Red O staining of the aorta. Intercostal arteries were indicated by the yellow arrows. D. Quantification of the intercostal lesion area presented as percentage of entire aorta (n=5). Values were compared using an unpaired t-test.

Supplemental Figure IV

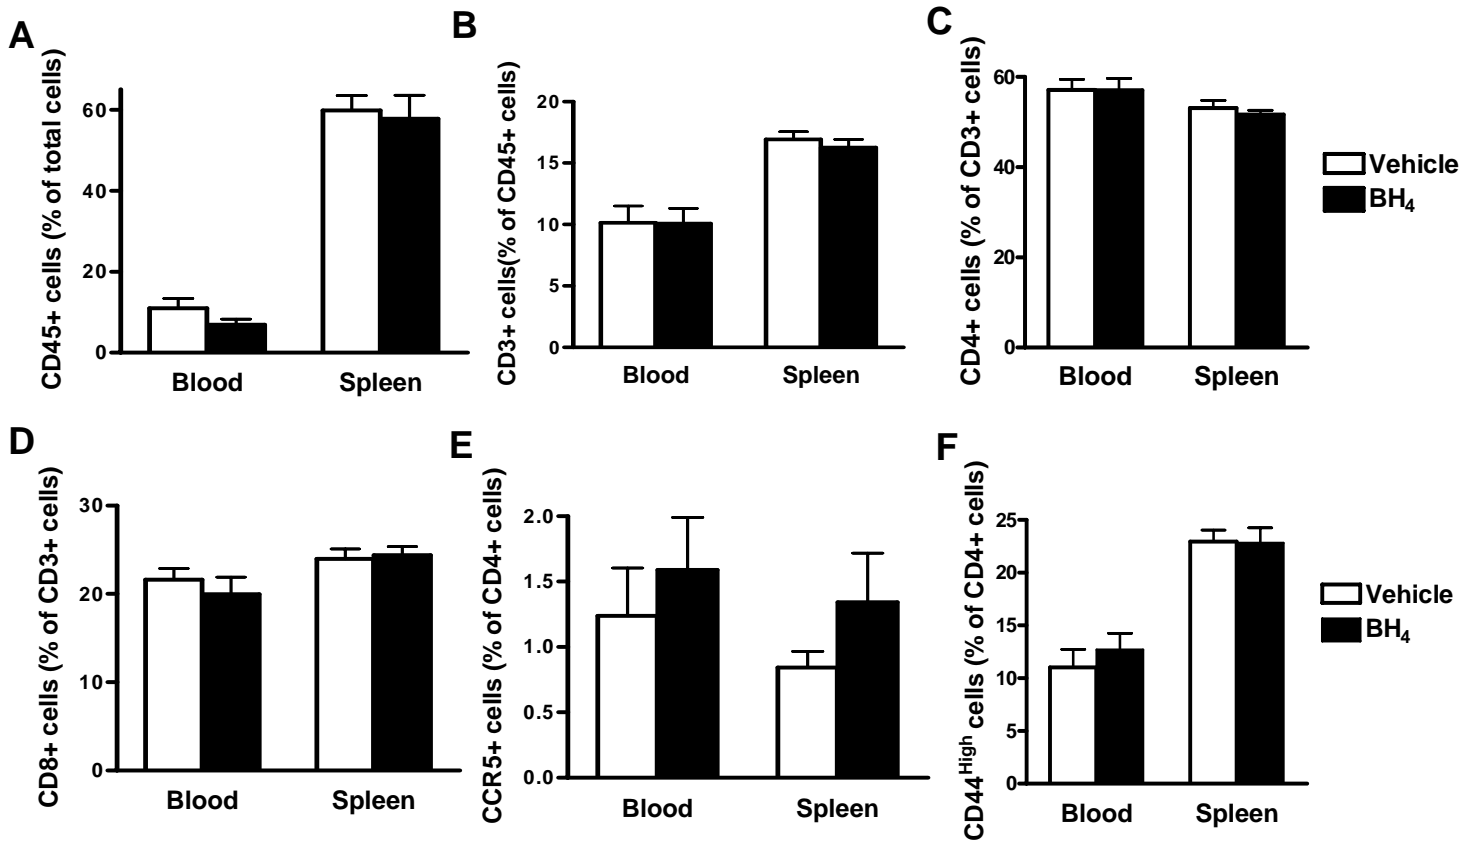

**Supplemental Figure IV:** Effect of BH<sub>4</sub> treatment on T cell numbers and activation in the peripheral blood and spleen after partial carotid ligation. ApoE<sup>-/-</sup> mice were fed a high fat diet and underwent partial carotid ligation for 1 week. Animals also received BH<sub>4</sub> or vehicle in the drinking water. Percentages of CD45+ (Panel A), CD3+ (Panel B), CD4+ (Panel C), CD8+ (Panel D), CD4+CCR5+ (Panel E), and CD4+CD44<sup>High</sup> (Panel F) cells were shown (n=6).
